# Supplementary material for: Evaluation of the effectiveness of high-risk human papilloma self-sampling test for cervical cancer screening in Bolivia
Source: Springer Nature journal article supplement (doi:10.1186/s12879-020-04963-2), 2020-04-03
Supplement: MOESM1 [file 17864410]

Biopsy result agreement to detect CIN2 or worse

|                          | Rereading biopsy results in Belgium |                    | Total biopsies |
|--------------------------|-------------------------------------|--------------------|----------------|
|                          | Agreement N (%)                     | Disagreement N (%) |                |
| Bolivian biopsies result | 16 (84 %)                           | 3 (16 %)           | 19 (100 %)     |

Biopsy result agreement to detect CIN1

|                          | Rereading biopsy results in Belgium |                    | Total biopsies |
|--------------------------|-------------------------------------|--------------------|----------------|
|                          | Agreement N (%)                     | Disagreement N (%) |                |
| Bolivian biopsies result | 7 ( 70 %)                           | 3 (30 %)           | 10 (100 %)     |
